# Supplementary material for: Prognostic value of antitumor drug targets prediction using integrated bioinformatic analysis for immunogenic cell death-related lncRNA model based on stomach adenocarcinoma characteristics and tumor immune microenvironment
Source: Frontiers journal article supplement (doi:10.3389/fphar.2022.1022294), 2022-10-14

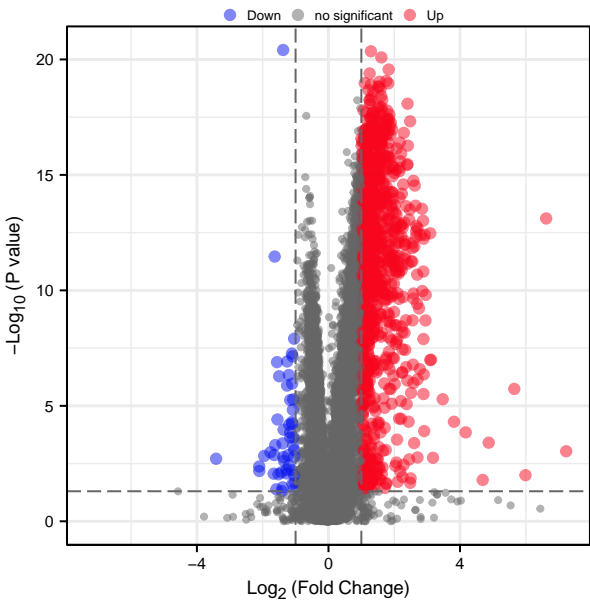

Supplement: Data_Sheet_2.PDF [file Data_Sheet_2.PDF]
